# Supplementary material for: An Upgrade on the Rabbit Model of Anthracycline-Induced Cardiomyopathy: Shorter Protocol, Reduced Mortality, and Higher Incidence of Overt Dilated Cardiomyopathy
Source: Hindawi journal article supplement (doi:10.1155/2015/465342), 2015-01-01
Supplement: f1 [file 465342.f1.pdf]

1  
2

**Supplemental Table 1.** Selected biochemical parameters in Male and Female at final time point.

| <i>Parameter</i>                    | <i>Males</i>      | <i>Females</i>    |
|-------------------------------------|-------------------|-------------------|
| <b><i>Cholesterol (mg/dL)</i></b>   |                   |                   |
| Control                             | 46.9 ± 13.1       | 41.5 ± 8.8        |
| DOX2                                | 252.70 ± 82.67 c¶ | 296.30 ± 64.03 c¶ |
| DAU3                                | 79.40 ± 11.10 n   | 80.05 ± 8.87 n    |
| DAU4                                | 55.07 ± 13.17 c   | 56.14 ± 15.83 c   |
| <b><i>Triglycerides (mg/dL)</i></b> |                   |                   |
| Control                             | 65.9 ± 22.2       | 58.1 ± 12.3       |
| DOX2                                | 408.13 ± 49.09 c¶ | 388.82 ± 27.17 c¶ |
| DAU3                                | 436.66 ± 125.59 n | 533.60 ± 66.77 n  |
| DAU4                                | 102.58 ± 26.04 c  | 118.99 ± 21.29 c  |
| <b><i>Creatinine (mg/dL)</i></b>    |                   |                   |
| Control                             | 0.84 ± 0.10       | 0.81 ± 0.06       |
| DOX2                                | 1.87 ± 0.33 c     | 1.46 ± 0.12 c     |
| DAU3                                | 2.66 ± 0.60 n     | 2.79 ± 0.53 n     |
| DAU4                                | 0.87 ± 0.19       | 1.05 ± 0.17       |
| <b><i>BUN (mg/dL)</i></b>           |                   |                   |
| Control                             | 36.99 ± 6.34      | 44.37 ± 8.75      |
| DOX2                                | 41.66 ± 8.21      | 38.58 ± 8.75      |
| DAU3                                | 79.60 ± 14.85 n   | 91.35 ± 20.59 n   |
| DAU4                                | 38.60 ± 5.40      | 36.85 ± 4.87      |
| <b><i>Total Proteins (g/dL)</i></b> |                   |                   |
| Control                             | 5.22 ± 0.12       | 5.48 ± 0.22       |
| DOX2                                | 3.63 ± 0.19 c¶    | 3.78 ± 0.53 c¶    |

|                  |                  |                  |
|------------------|------------------|------------------|
| DAU3             | 4.66 ± 1.15 n    | 4.74 ± 1.31 n    |
| DAU4             | 4.99 ± 0.50      | 4.88 ± 0.41      |
| <b>AST (U/L)</b> |                  |                  |
| Control          | 20.48 ± 4.23     | 26.33 ± 4.40     |
| DOX2             | 29.78 ± 0.96     | 30.42 ± 1.02     |
| DAU3             | 350.57 ± 187.7 n | 356.40 ± 185.2 n |
| DAU4             | 26.62 ± 18.70    | 31.32 ± 14.85    |
| <b>ALT (U/L)</b> |                  |                  |
| Control          | 38.83 ± 8.83     | 51.12 ± 7.89     |
| DOX2             | 33.46 ± 3.02     | 35.36 ± 4.40     |
| DAU3             | 288.83 ± 116.2 n | 289.57 ± 105.9 n |
| DAU4             | 49.27 ± 15.08    | 45.08 ± 3.39     |

---

BUN = blood urea nitrogen; AST = aspartate aminotransferase; ALT = alanine aminotransferase.

Data expressed as mean ± SEM. Statistical significance:  $p < 0.05$ , (c) : compared to control; (\*) : compared to DOX2; (¶) : compared to DAU4; (n) : low  $n$ , type II error.

1  
2  
3  
4  
5  
6  
7  
8  
9  
10  
11  
12

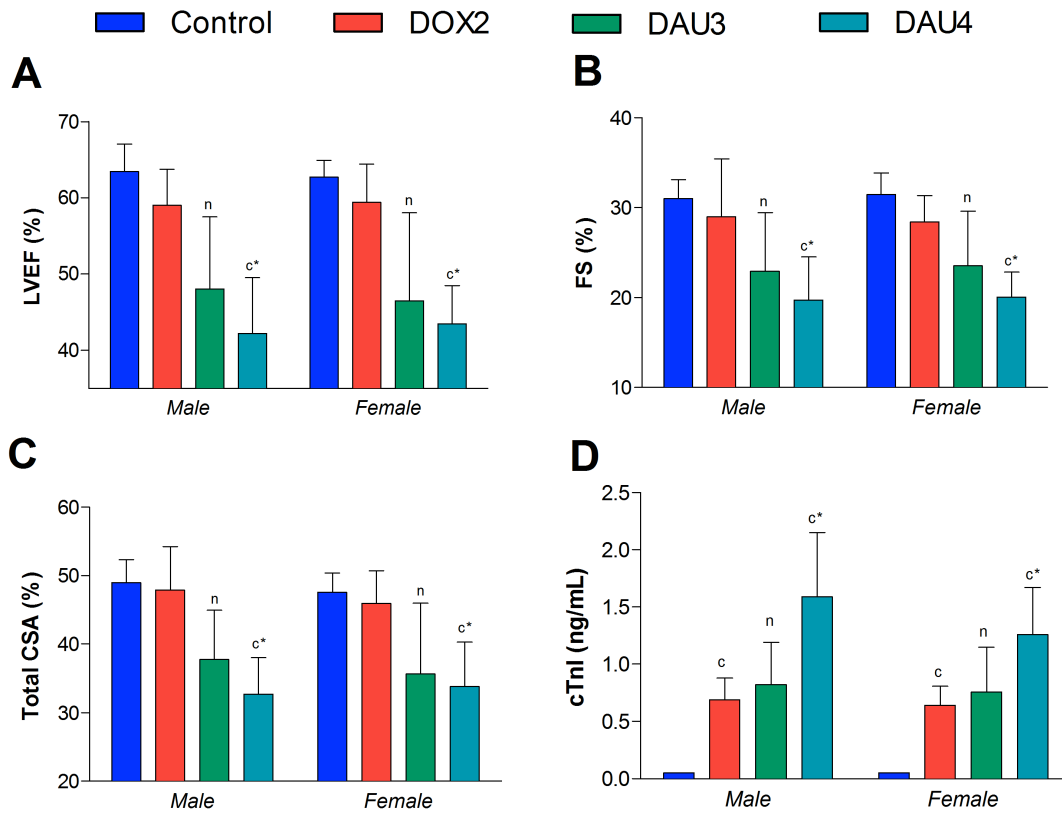

**Supplemental Figure 1. Echocardiographic and cTnI values in Males and Females at final time point.** (A). Left ventricular ejection fraction (LVEF); (B). Fractional shortening (FS); (C). Total circumferential shortening area (CSA). (D). Cardiac Troponin I (cTnI) levels. Data expressed as mean  $\pm$  SEM. Statistical significance:  $p < 0.05$ , (c) : compared to control; (\*) : compared to DOX2, (n) : low n, type II error.
